# Supplementary material
Source: publisher figshare collection journal article supplement (https://acs.figshare.com/ndownloader/files/3817543)
Supplement: Supplementary file 1 [file 3817543]

## Supporting Information

### Polymer/Polymer Blend Solar Cells Using Tetraazabenzodifluoranthene Diimide Conjugated Polymers as Electron Acceptors

Haiyan Li,<sup>†</sup> Ye-Jin Hwang,<sup>†</sup> Taeshik Earmme,<sup>†</sup> Rachel C. Huber,<sup>‡</sup> Brett A. E. Courtright,<sup>†</sup> Conor O'Brien,<sup>†</sup> Sarah H. Tolbert<sup>‡,§</sup> and Samson A. Jenekhe<sup>\*,†</sup>

<sup>†</sup> Department of Chemical Engineering and Department of Chemistry, University of Washington, Seattle, WA 98195-1750, USA.

<sup>‡</sup> Department of Chemistry and Biochemistry and the California NanoSystems Institute, UCLA, , Los Angeles, California 90095-1569, USA.

<sup>§</sup> Department of Materials Science and Engineering, UCLA, Los Angeles, CA 90095, USA

#### 1. Supporting Figures

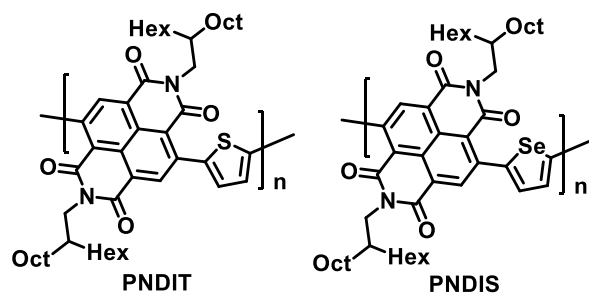

Figure S1. Molecular structures of PNDIT and PNDIS.

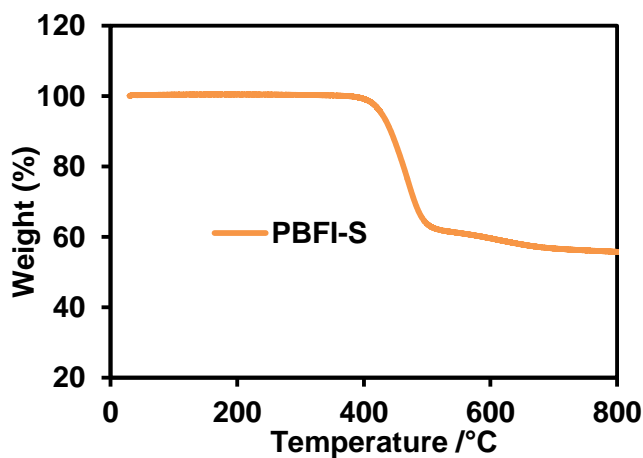

Figure S2. The TGA trace of PBFI-S (heating at 10 °C/min under N<sub>2</sub>).

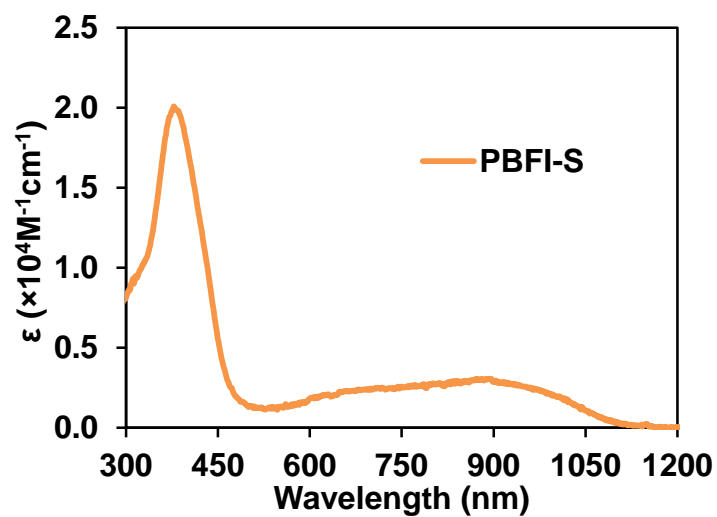

Figure S3. Optical absorption spectra of PBFI-S in  $\text{CHCl}_3$ .

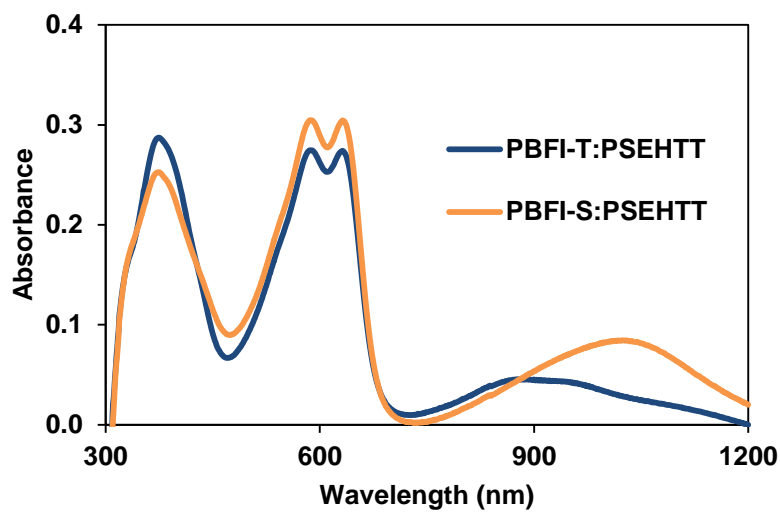

Figure S4. Optical absorption spectra of PBFI-T:PSEHTT and PBFI-S:PSEHTT blend active layers.

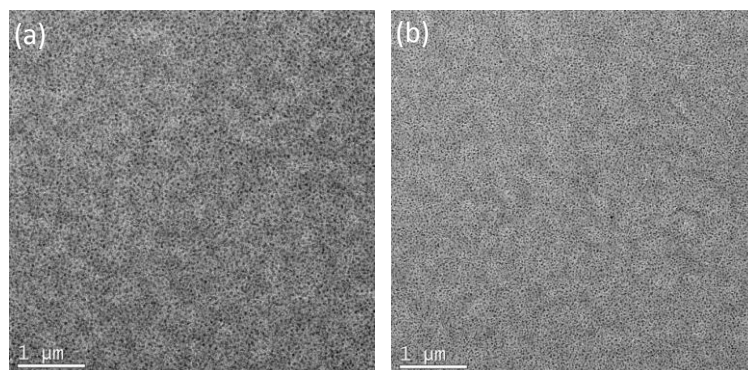

Figure S5. Bright-field TEM images of the PBFI-S:PSEHTT (a) and PBFI-T:PSEHTT (b) blends.

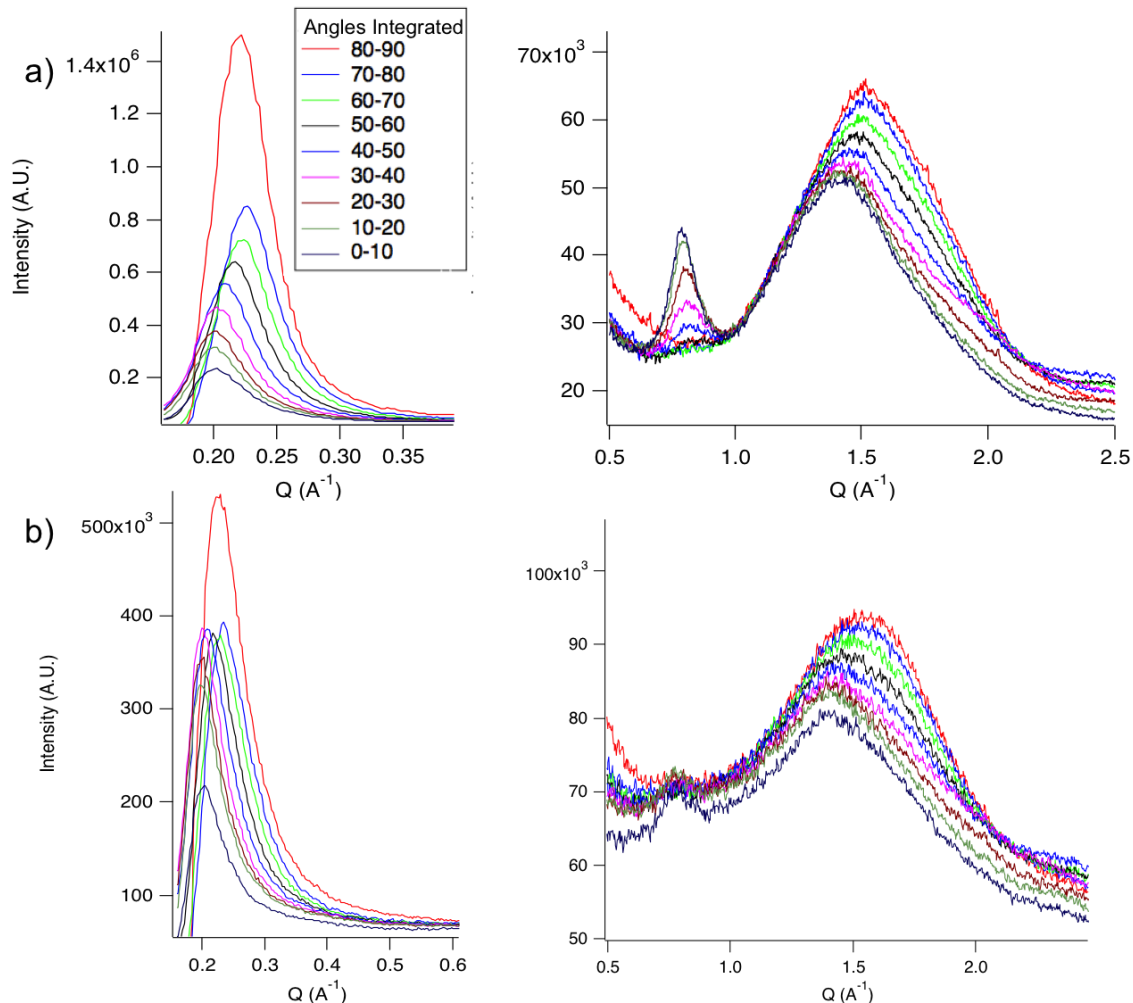

Figure S6: X-ray diffraction patterns as a function of diffractometer angle  $\chi$ . Pure PBFI-T (a) and pure PBFI-S (b) integrations of 2D diffraction pattern in  $10^\circ$  slices from  $0$ - $90^\circ$ . The  $0$ - $10^\circ$  integration corresponds to the in-plane diffraction and the  $80$ - $90^\circ$  integration is the out-of-plane diffraction. The shift between in and out-of-plane is significant for both the (100) and (010) peaks. Because a gradual peak shift is observed going from in- to out-of-plane diffraction, this shift is likely indicative of a real change in lattice constant caused by packing differences between edge-on and face-on oriented polymer chains. It is unlikely to be caused by interference from specular reflectance, which should only affect angle near  $90^\circ$ .

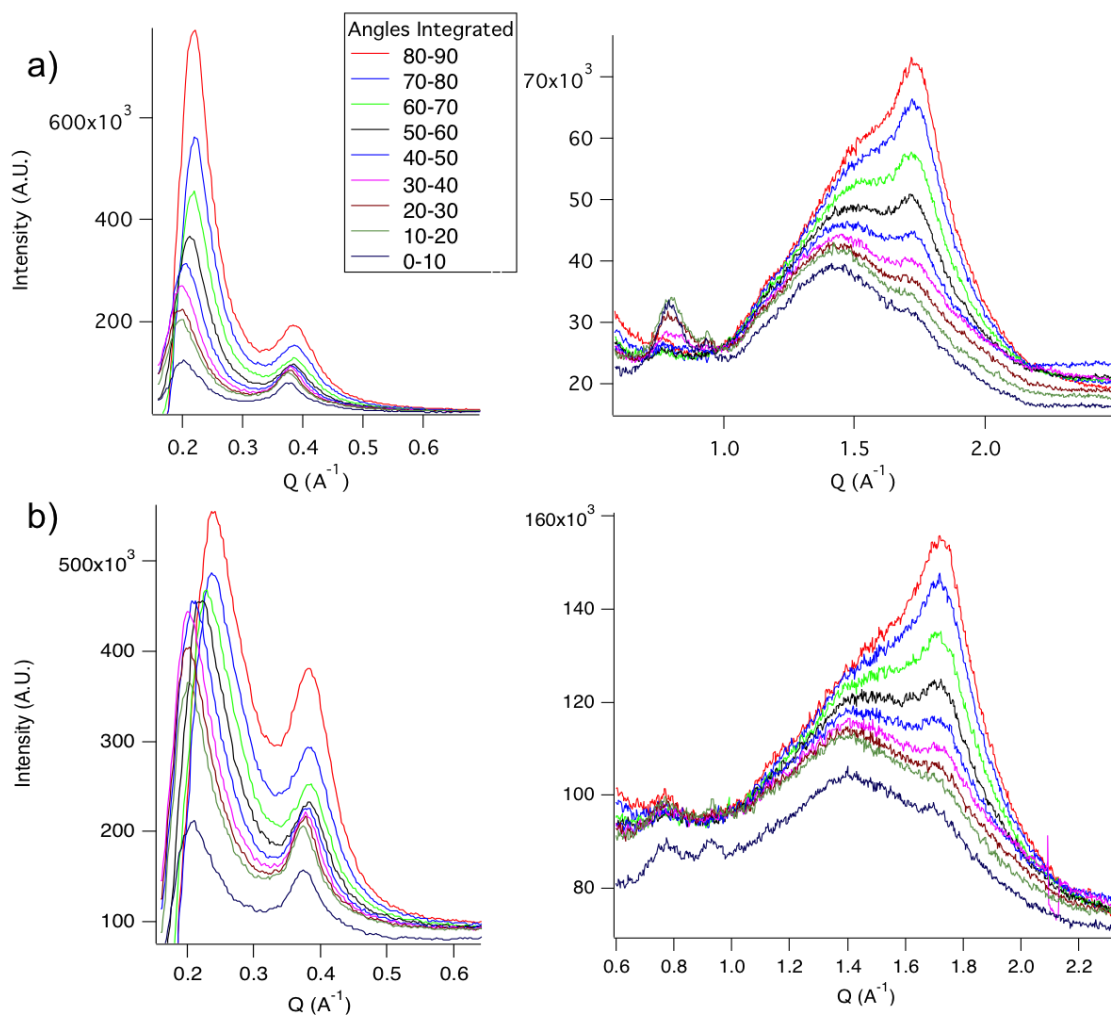

Figure S7: a) X-ray diffraction patterns as a function of diffractometer angle  $\chi$ . PSEHTT:PBFI-T BHI blend (a) and PSEHTT:PBFI-S blend (b) integrations of 2D diffraction pattern in  $10^\circ$  slices from  $0-90^\circ$ . The  $0-10^\circ$  integration corresponds to the in-plane diffraction and the  $80-90^\circ$  integration is the out-of-plane diffraction. Significant shifts are again observed for the PBFI-T and PBFI-S peaks, but the PSEHTT peaks show almost no shifts, indicating less conformational freedom for the PSEHTT.

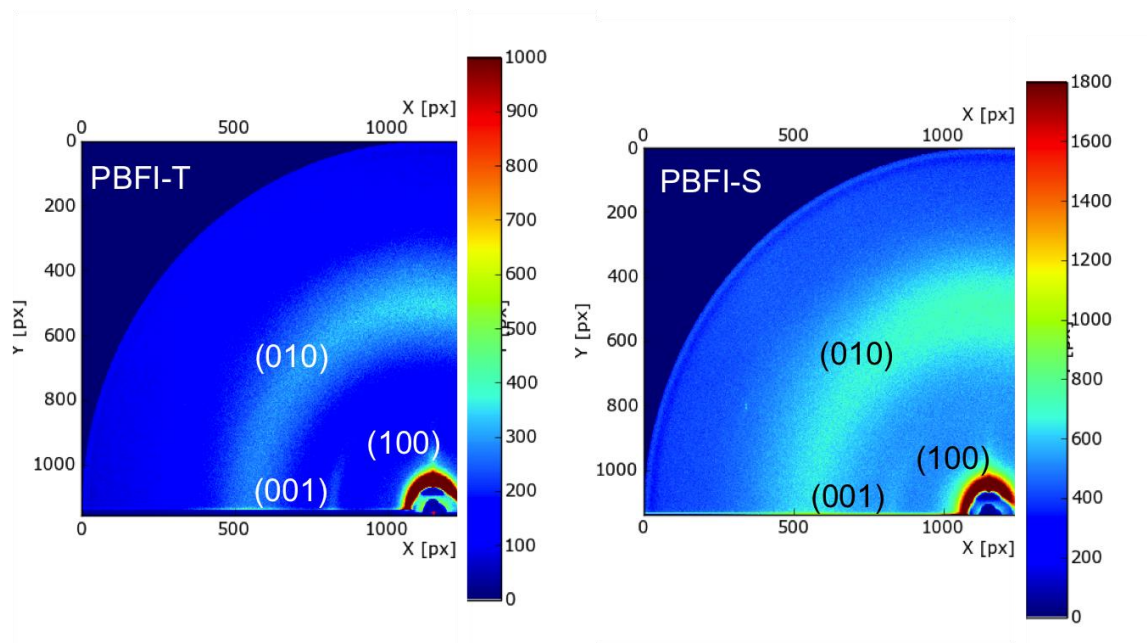

Figure S8: Raw 2D grazing incidence diffraction patterns for pure PBFI-T and PBFI-S films. The vertical axis corresponds to out-of-plane diffraction and the horizontal axis corresponds to in-plane diffraction. Peaks are indexed on the image.

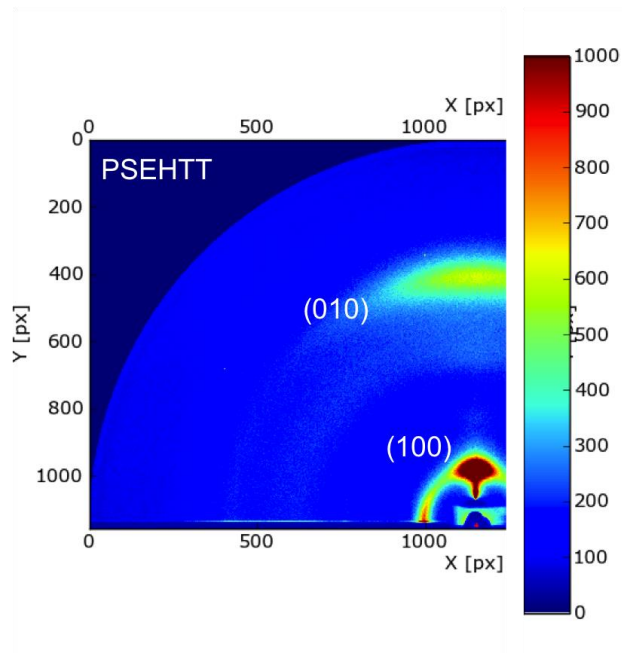

Figure S9: Raw 2D grazing incidence diffraction patterns for a pure PSEHTT film. The vertical axis corresponds to out-of-plane diffraction and the horizontal axis corresponds to in-plane diffraction. Peaks are indexed on the image.

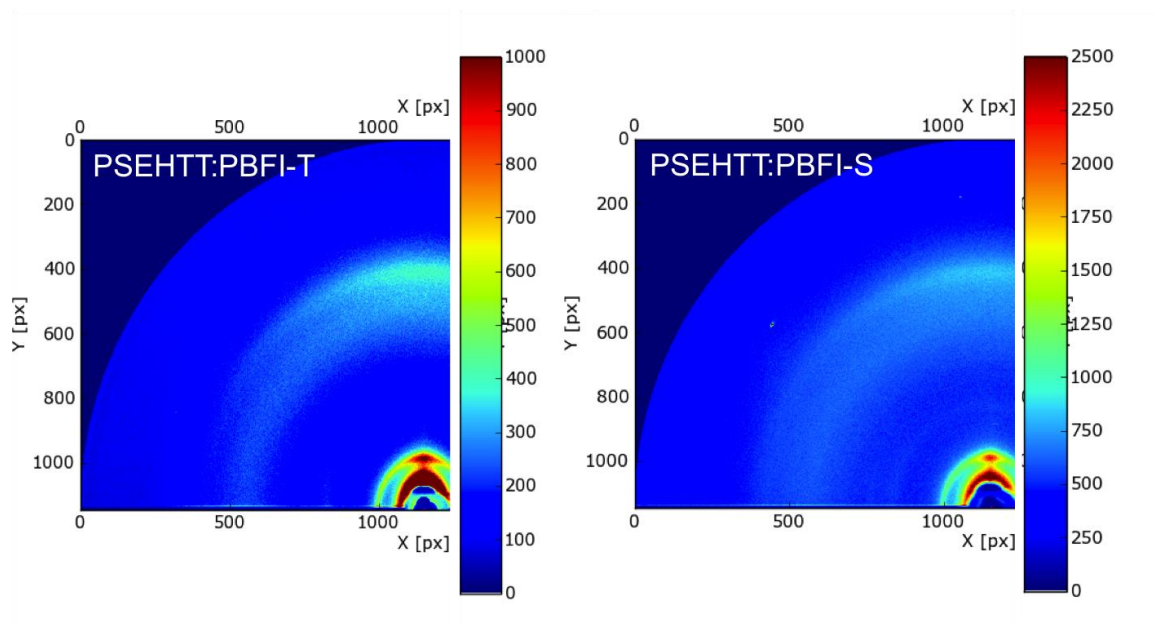

Figure S10: Raw 2D grazing incidence diffraction patterns for PSEHTT:PBFI-T and PSEHTT:PBFI-S blend films. The vertical axis corresponds to out-of-plane diffraction and the horizontal axis corresponds to in-plane diffraction.

**Table S1. Summary of photovoltaic properties of PBFI-T:PSEHTT and PBFI-S:PSEHTT blends<sup>a</sup>**

| Blend             | Blend Ratio<br>(wt:wt) | $J_{sc}$<br>(mA/cm <sup>2</sup> ) | $V_{oc}$<br>(V)     | $FF$                | PCE<br>(%)          |
|-------------------|------------------------|-----------------------------------|---------------------|---------------------|---------------------|
| PBFI-T:<br>PSEHTT | 3:1                    | 3.86<br>(3.78±0.07)               | 0.67<br>(0.67±0.00) | 0.50<br>(0.49±0.01) | 1.30<br>(1.23±0.6)  |
| PBFI-T:<br>PSEHTT | 1:1                    | 5.18<br>(5.15±0.03)               | 0.68<br>(0.68±0.00) | 0.53<br>(0.52±0.01) | 1.87<br>(1.82±0.05) |
| PBFI-S:<br>PSEHTT | 3:1                    | 2.52<br>(2.47±0.05)               | 0.51<br>(0.51±0.00) | 0.36<br>(0.36±0.01) | 0.46<br>(0.46±0.01) |
| PBFI-S:<br>PSEHTT | 1:1                    | 2.83<br>(2.73±0.09)               | 0.51<br>(0.51±0.00) | 0.43<br>(0.44±0.01) | 0.62<br>(0.62±0.01) |

<sup>a</sup>Active layers were deposited from the PBFI-X (X = T or S):PSEHTT (1:1 or 3:1 wt/wt) blend solutions in chlorobenzene, respectively, followed by annealing at 175 °C for 10 min.

**Table S2: In- and out-of-plane peak positions of pure polymers, blends and fits for Figures 6 and 7.**

|                    | Out-of-Plane Peak Position (Å <sup>-1</sup> ) |       |       |      | In-Plane Peak Position (Å <sup>-1</sup> ) |       |       |      |
|--------------------|-----------------------------------------------|-------|-------|------|-------------------------------------------|-------|-------|------|
|                    | (100)                                         | (001) | (010) |      | (100)                                     | (001) | (010) |      |
| PBFI-T             | 0.22                                          | 0.80  | 1.52  |      | 0.20                                      | 0.80  | 1.44  |      |
| PBFI-S             | 0.23                                          | 0.80  | 1.57  |      | 0.20                                      | 0.80  | 1.39  |      |
| PSEHTT             | 0.38                                          | ---   | 1.31  | 1.72 | 0.37                                      | 0.93  | 1.31  | 1.72 |
| PBFI-T:PSEHTT      | PBFI-T                                        | 0.22  | ---   | 1.52 | 0.2                                       | 0.80  | 1.41  |      |
|                    | PSEHTT                                        | 0.39  | ---   | 1.73 | 0.38                                      | 0.93  | 1.70  |      |
| PBFI-S:PSEHTT      | PBFI-S                                        | 0.24  | ---   | 1.56 | 0.21                                      | 0.80  | 1.39  |      |
|                    | PSEHTT                                        | 0.38  |       | 1.72 | 0.37                                      | 0.93  | 1.70  |      |
| PBFI-T:PSEHTT Fits | PBFI-T                                        | 0.22  | ---   | 1.51 | 0.20                                      | 0.80  | 1.43  |      |
|                    | PSEHTT                                        | 0.41  | ---   | 1.73 | 0.37                                      | 0.93  | ---   |      |
| PBFI-S:PSEHTT Fits | PBFI-S                                        | 0.23  | ---   | 1.55 | 0.20                                      | 0.80  | 1.37  |      |
|                    | PSEHTT                                        | 0.40  | ---   | 1.73 | 0.37                                      | 0.93  | 1.70  |      |
